# Supplementary material for: Betulinic Acid Targets YY1 and ErbB2 through Cannabinoid Receptor-Dependent Disruption of MicroRNA-27a:ZBTB10 in Breast Cancer
Source: Oxford University Press journal article supplement (doi:10.1158/1535-7163.mct-12-0026), 2012-05-03
Supplement: 15357163mct120026-sup-fig1.pdf [file 15357163mct120026-sup-fig1.pdf]

## Supplemental Figure 1

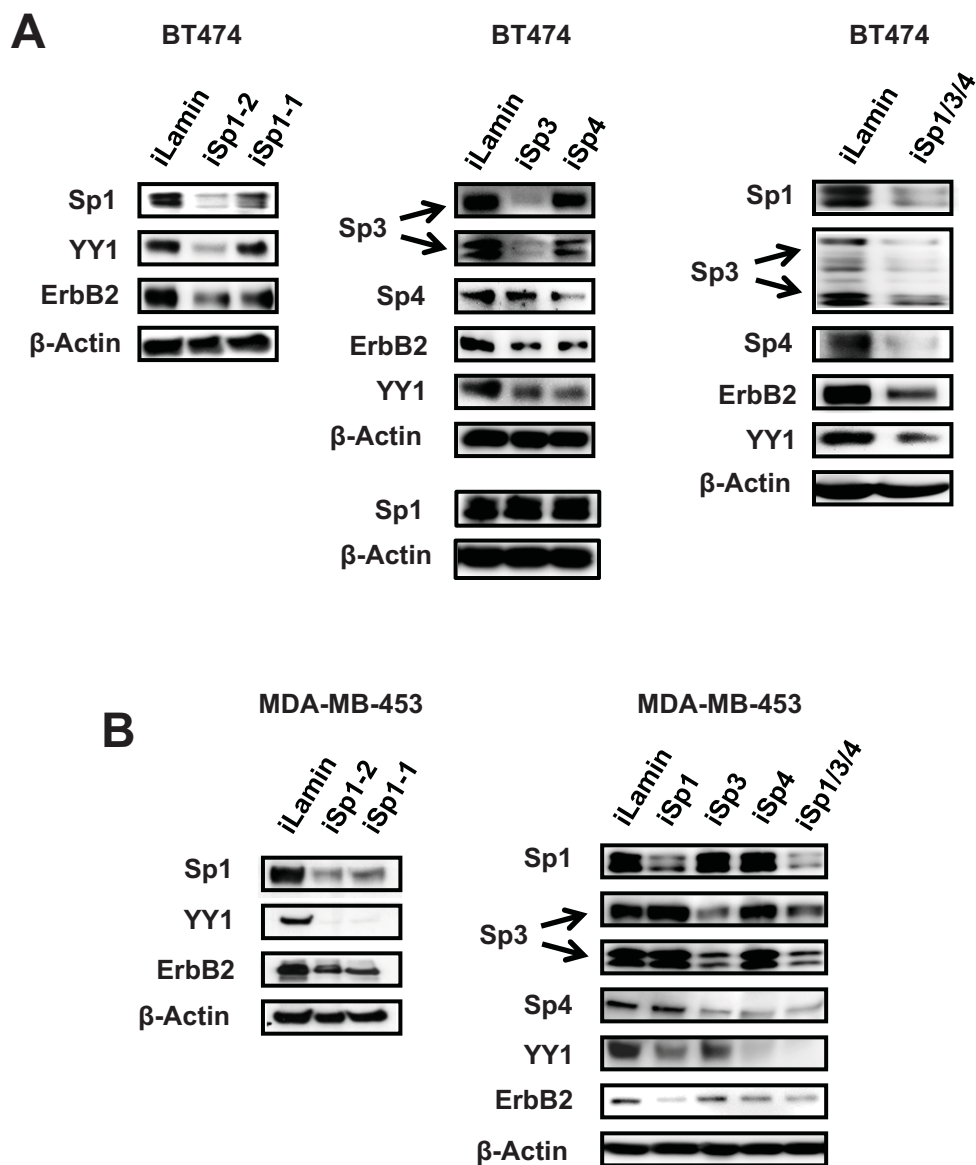

**Supplemental Figure 1.** Role of Sp proteins in regulating level of YY1 protein. Knockdown of Sp1, Sp3, Sp4 or Sp1/Sp3/Sp4 in combination decreases protein levels of YY1 and ErbB2 in BT474 (A) and MDA-MB-453 (B) cells. Cells were transfected with siRNAs for Sp1, Sp3, Sp4 or Sp1/Sp3/Sp4 in combination for 72 hr, and whole cell lysates were analyzed by western blots as described in the Materials and Methods. Two different oligonucleotides were used for Sp1 knockdown (iSp1-2 and iSp1-1 (A), and iSp1-2 was used in (B) (right hand panel). iLamin was used as the control oligonucleotide in the knockdown studies.
