# Supplementary material for: Betulinic Acid Targets YY1 and ErbB2 through Cannabinoid Receptor-Dependent Disruption of MicroRNA-27a:ZBTB10 in Breast Cancer
Source: Oxford University Press journal article supplement (doi:10.1158/1535-7163.mct-12-0026), 2012-05-03
Supplement: 15357163mct120026-sup-fig2.pdf [file 15357163mct120026-sup-fig2.pdf]

## Supplemental Figure 2

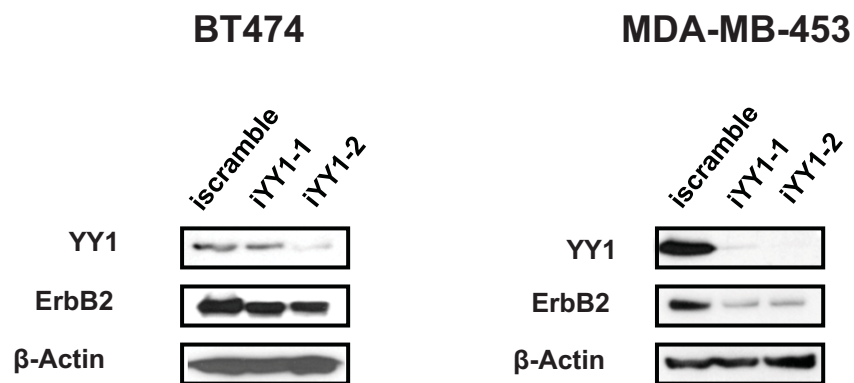

**Supplemental Figure 2.** Knockdown of YY1 decreases protein levels of ErbB2 in BT474 and MDA-MB-453 cells. Cells were transfected with siRNA for YY1 for 72 hr, and whole cell lysates were analyzed by western blots as described in the Materials and Methods.
