# Supplementary material for: Betulinic Acid Targets YY1 and ErbB2 through Cannabinoid Receptor-Dependent Disruption of MicroRNA-27a:ZBTB10 in Breast Cancer
Source: Oxford University Press journal article supplement (doi:10.1158/1535-7163.mct-12-0026), 2012-05-03
Supplement: 15357163mct120026-sup-fig3.pdf [file 15357163mct120026-sup-fig3.pdf]

## Supplemental Figure 3

### RKO (36 hr treatment)

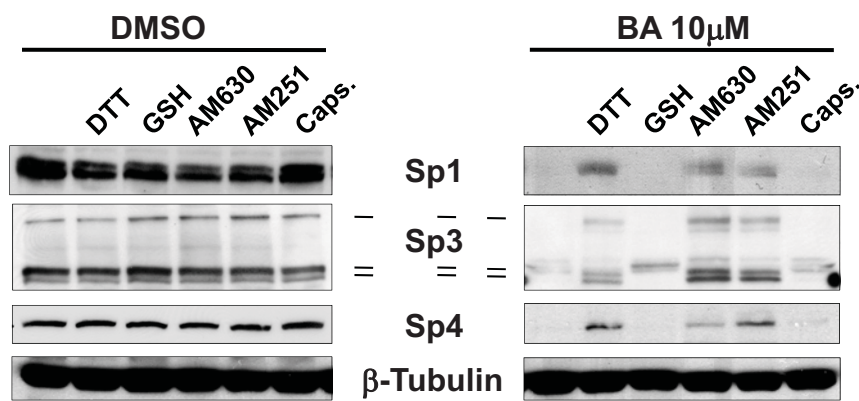

**Supplemental Figure 3.** BA-mediated downregulation of Sp1, Sp3 and Sp4 partially blocked by CB receptor antagonists. RKO colon cancer cells were treated with DMSO or 10  $\mu$ M BA alone or in combination with DTT, glutathione (GSH), 5  $\mu$ M AM630, 5  $\mu$ M AM251, and 2  $\mu$ M capsazepine. Whole cell lysates were analyzed by western blots.
