# Supplementary material for: Betulinic Acid Targets YY1 and ErbB2 through Cannabinoid Receptor-Dependent Disruption of MicroRNA-27a:ZBTB10 in Breast Cancer
Source: Oxford University Press journal article supplement (doi:10.1158/1535-7163.mct-12-0026), 2012-05-03
Supplement: 15357163mct120026-sup-figleg.pdf [file 15357163mct120026-sup-figleg.pdf]

## **SUPPLEMENTAL FIGURE CAPTIONS**

Supplemental Figure 1. Role of Sp proteins in regulating level of YY1 protein.

Knockdown of Sp1, Sp3, Sp4 or Sp1/Sp3/Sp4 in combination decreases protein levels of YY1 and ErbB2 in BT474 (A) and MDA-MB-453 (B) cells. Cells were transfected with siRNAs for Sp1, Sp3, Sp4 or Sp1/Sp3/Sp4 in combination for 72 hr, and whole cell lysates were analyzed by western blots as described in the Materials and Methods. Two different oligonucleotides were used for Sp1 knockdown (iSp1-2 and iSp1-1 (A), and iSp1-2 was used in (B) (right hand panel). iLamin was used as the control oligonucleotide in the knockdown studies.

Supplemental Figure 2. Knockdown of YY1 decreases protein levels of ErbB2 in BT474 and MDA-MB-453 cells. Cells were transfected with siRNA for YY1 for 72 hr, and whole cell lysates were analyzed by western blots as described in the Materials and Methods.

Supplemental Figure 3. BA-mediated downregulation of Sp1, Sp3 and Sp4 partially blocked by CB receptor antagonists. RKO colon cancer cells were treated with DMSO or 10  $\mu$ M BA alone or in combination with DTT, glutathione (GSH), 5  $\mu$ M AM630, 5  $\mu$ M AM251, and 2  $\mu$ M capsazepine. Whole cell lysates were analyzed by western blots.
